# Supplementary material for: Green Synthesis of Free Standing Cellulose/Graphene Oxide/Polyaniline Aerogel Electrode for High-Performance Flexible All-Solid-State Supercapacitors
Source: PubMed Central journal article supplement (PMC7466413; doi:10.3390/nano10081546), 2020-08-07
Supplement: nanomaterials-10-01546-s001.pdf [file nanomaterials-10-01546-s001.pdf]

# Green Synthesis of Free Standing Cellulose/Graphene Oxide/Polyaniline Aerogel Electrode for High-Performance Flexible All-Solid-State Supercapacitors

Yueqin Li <sup>1,2,\*</sup>, Zongbiao Xia <sup>1,2</sup>, Qiang Gong <sup>1,2</sup>, Xiaohui Liu <sup>1,2</sup>, Yong Yang <sup>1,2</sup>, Chen Chen <sup>2</sup> and Changhao Qian <sup>2</sup>

<sup>1</sup> Co-Innovation Center of Efficient Processing and Utilization of Forest Resources, Nanjing Forestry University, Nanjing 210037, China; zongbiaoxia@163.com (Z.X.); qianggong@163.com (Q.G.); xiaohuilu@163.com (X.L.); yongyang@163.com (Y.Y.)

<sup>2</sup> College of Chemical Engineering, Jiangsu Key Lab for the Chemistry and Utilization of Agricultural and Forest Biomass, Nanjing Forestry University, Nanjing 210037, China; chenchen@163.com (C.C.); changhaoqian@163.com (C.Q.)

\* Correspondence: yueqinli@njfu.edu.cn; Tel.: +86-025-85427024

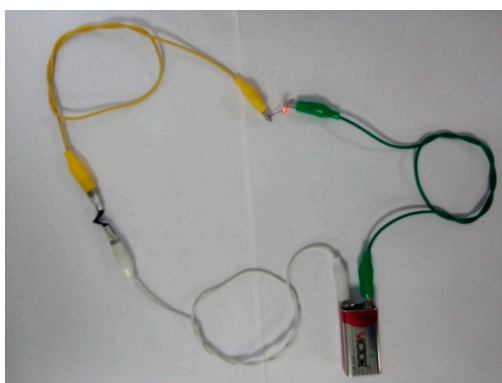

Figure S1. The cellulose/GO<sub>3.5</sub>/PANI film was folded and used as a wire to light up a red LED.

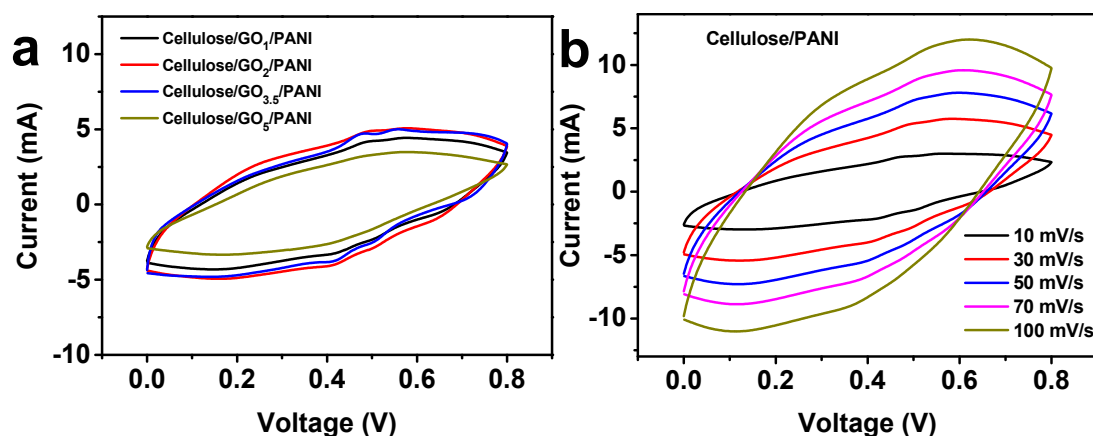

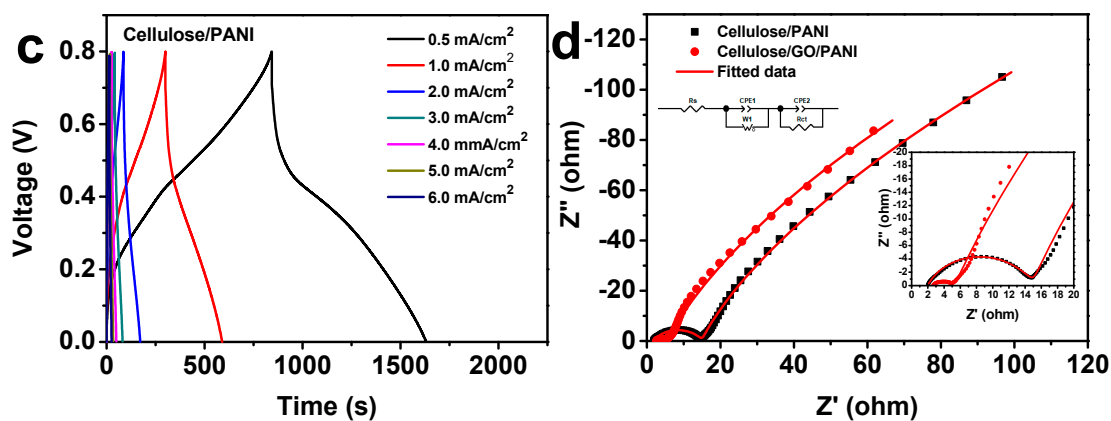

**Figure S2.** (a) CV curves of the cellulose/GO<sub>1.0</sub>/PANI, cellulose/GO<sub>2.0</sub>/PANI, cellulose/GO<sub>3.5</sub>/PANI and cellulose/GO<sub>5.0</sub>/PANI samples at 10 mV/s. (b) CV curves of cellulose/PANI sample. (c) GCD curves of cellulose/PANI sample. (d) Nyquist plot of the cellulose/PANI and cellulose/GO/PANI with an equivalent circuit in the inset.

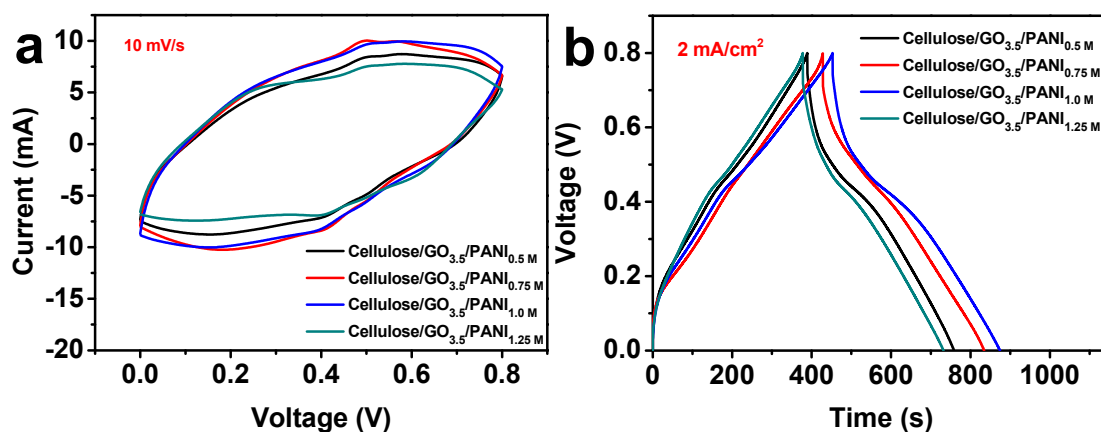

**Figure S3.** (a) CV curves of the cellulose/GO<sub>3.5</sub>/PANI<sub>0.5M</sub>, cellulose/GO<sub>3.5</sub>/PANI<sub>0.75M</sub>, cellulose/GO<sub>3.5</sub>/PANI<sub>1.0M</sub> (namely cellulose/GO<sub>3.5</sub>/PANI sample in the manuscript) and cellulose/GO<sub>3.5</sub>/PANI<sub>1.25M</sub> samples at 10 mV/s. (b) GCD curves of the cellulose/GO<sub>3.5</sub>/PANI<sub>0.5M</sub>, cellulose/GO<sub>3.5</sub>/PANI<sub>0.75M</sub>, cellulose/GO<sub>3.5</sub>/PANI<sub>1.0M</sub> and cellulose/GO<sub>3.5</sub>/PANI<sub>1.25M</sub> samples.

**Table S1.** Comparison of electrochemical performance of various electrodes based on conducting fillers/cellulose composites.

| Materials                         | Maximum C <sub>s</sub> (mF/cm <sup>2</sup> ) | Cyclic stability | Reference |
|-----------------------------------|----------------------------------------------|------------------|-----------|
| Graphene/cellulose paper          | 81 (1 mV/s)                                  | 99.1% (5000)     | [1]       |
| SWCNT/PANI/cellulose              | 330 (0.2 mA/cm <sup>2</sup> )                | 79% (1000)       | [2]       |
| Graphite /PANI/paper              | 355.6 (0.5 mA/cm <sup>2</sup> )              | -                | [3]       |
| GO/PPy                            | 387.6 (0.2 mA/cm <sup>2</sup> )              | 84.8% (5000)     | [4]       |
| CNT/PANI hydrogel                 | 680 (1 mA/cm <sup>2</sup> )                  | -                | [5]       |
| PANI/Graphite paper               | 176 (0.2 mA/cm <sup>2</sup> )                | -                | [6]       |
| PANI/RGO film                     | 718 (0.45 A/g)                               | 74% (500)        | [7]       |
| Graphene/PANI/Graphene            | 190.6 (0.5 mA/cm <sup>2</sup> )              | 96% (1000)       | [8]       |
| RGO/PPy CCFs paper                | 363 (0.5 mA/cm <sup>2</sup> )                | -                | [9]       |
| Carbon cloth-PANI-rGO             | 471 (0.5 mA/cm <sup>2</sup> )                | 75.5% (10000)    | [10]      |
| PANI/CNT/Graphene                 | 465 (1 mA/cm <sup>2</sup> )                  | 84% (1000)       | [11]      |
| PANI/GO/CNT                       | 510.5 (1 A/g)                                | -                | [12]      |
| CNFs-RGO/PPy                      | 334 (0.1 mA/cm <sup>2</sup> )                | 100% (2000)      | [13]      |
| Cellulose/GO <sub>3.5</sub> /PANI | 1218 (1.0 mA/cm <sup>2</sup> )               | 83.5% (1000)     | This work |

## References

1. Weng, Z.; Su, Y.; Wang, D.-W.; Li, F.; Du, J.; Cheng, H.-M. Graphene-cellulose paper flexible supercapacitors. *Adv. Energy Mater.* **2011**, *1*, 917–922.
2. Ge, D.; Yang, L.; Fan, L.; Zhang, C.; Xiao, X.; Gogotsi, Y.; Yang, S. Foldable supercapacitors from triple networks of macroporous cellulose fibers, single-walled carbon nanotubes and polyaniline nanoribbons. *Nano Energy* **2015**, *11*, 568–578.
3. Yao, B.; Yuan, L.; Xiao, X.; Zhang, J.; Qi, Y.; Zhou, J.; Zhou, J.; Hu, B.; Chen, W. Paper-based solid-state supercapacitors with pencil-drawing graphite/polyaniline networks hybrid electrodes. *Nano Energy* **2013**, *2*, 1071–1078.
4. Cao, J.; Wang, Y.; Chen, J.; Li, X.; Walsh, F.C.; Ouyang, J.-H.; Jia, D.; Zhou, Y. Three-dimensional graphene oxide/polypyrrole composite electrodes fabricated by one-step electrodeposition for high performance supercapacitors. *J. Mater. Chem. A* **2015**, *3*, 14445–14457.
5. Zeng, S.; Chen, H.; Cai, F.; Kang, Y.; Chen, M.; Li, Q. Electrochemical fabrication of carbon nanotube/polyaniline hydrogel film for all-solid-state flexible supercapacitor with high areal capacitance. *J. Mater. Chem. A* **2015**, *3*, 23864–23870.
6. Li, K.; Liu, X.; Chen, S.; Pan, W.; Zhang, J. A flexible solid-state supercapacitor based on graphene/polyaniline paper electrodes. *J. Energy Chem.* **2019**, *32*, 166–173.
7. Kim, M.; Lee, C.; Jang, J. Fabrication of highly flexible, scalable, and high-performance supercapacitors using polyaniline/reduced graphene oxide film with enhanced electrical conductivity and crystallinity. *Adv. Funct. Mater.* **2014**, *24*, 2489–2499.
8. Chi, K.; Zhang, Z.; Xi, J.; Huang, Y.; Xiao, F.; Wang, S.; Liu, Y. Freestanding graphene paper supported three-dimensional porous graphene-polyaniline nanocomposite synthesized by inkjet printing and in flexible all-solid-state supercapacitor. *ACS Appl Mater. Interfaces* **2014**, *6*, 16312–16319.
9. Lyu, S.; Chang, H.; Fu, F.; Hu, L.; Huang, J.; Wang, S. Cellulose-coupled graphene/polypyrrole composite electrodes containing conducting networks built by carbon fibers as wearable supercapacitors with excellent foldability and tailorability. *J. Power Sources* **2016**, *327*, 438–446.
10. Du, P.; Dong, Y.; Kang, H.; Yang, X.; Wang, Q.; Niu, J.; Wang, S.; Liu, P. Graphene-wrapped polyaniline nanowire array modified functionalized of carbon cloth for high-performance flexible solid-state supercapacitor. *ACS Sustain. Chem. Eng.* **2018**, *6*, 14723–14733.
11. Vedhanarayanan, B.; Huang, T.-H.; Lin, T.-W. Fabrication of 3D hierarchically structured carbon electrode for supercapacitors by carbonization of polyaniline/carbon nanotube/graphene composites. *Inorg. Chim. Acta* **2019**, *489*, 217–223.
12. Jiang, Q.; Shang, Y.; Sun, Y.; Yang, Y.; Hou, S.; Zhang, Y.; Xu, J.; Cao, A. Flexible and multi-form solid-state supercapacitors based on polyaniline/graphene oxide/CNT composite films and fibers. *Diam. Relat. Mater.* **2019**, *92*, 198–207.
13. Mo, M.; Chen, C.; Gao, H.; Chen, M.; Li, D. Wet-spinning assembly of cellulose nanofibers reinforced graphene/polypyrrole microfibers for high performance fiber-shaped supercapacitors. *Electrochim. Acta* **2018**, *269*, 11–20.
